# Supplementary material for: pH-dependent redox mechanism and evaluation of kinetic and thermodynamic parameters of a novel anthraquinone
Source: Royal Society of Chemistry journal article supplement (doi:10.1039/c4ra04462b), 2014-01-01
Supplement: c4ra04462b1.pdf [file c4ra04462b1.pdf]

### Supplementary figures

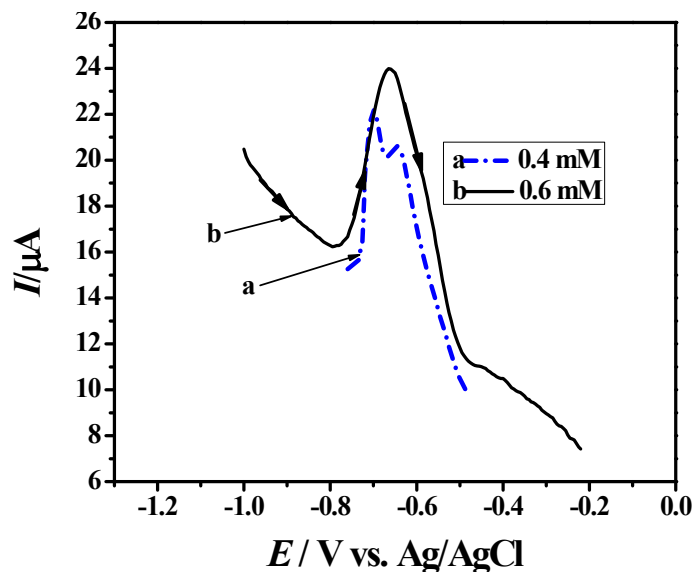

**Fig. S-1.** DPVs of 0.4 and 0.6 mM HCAQ recorded in pH 7.0 at  $5\text{ mVs}^{-1}$  after cathodic scan without cleaning the electrode surface.

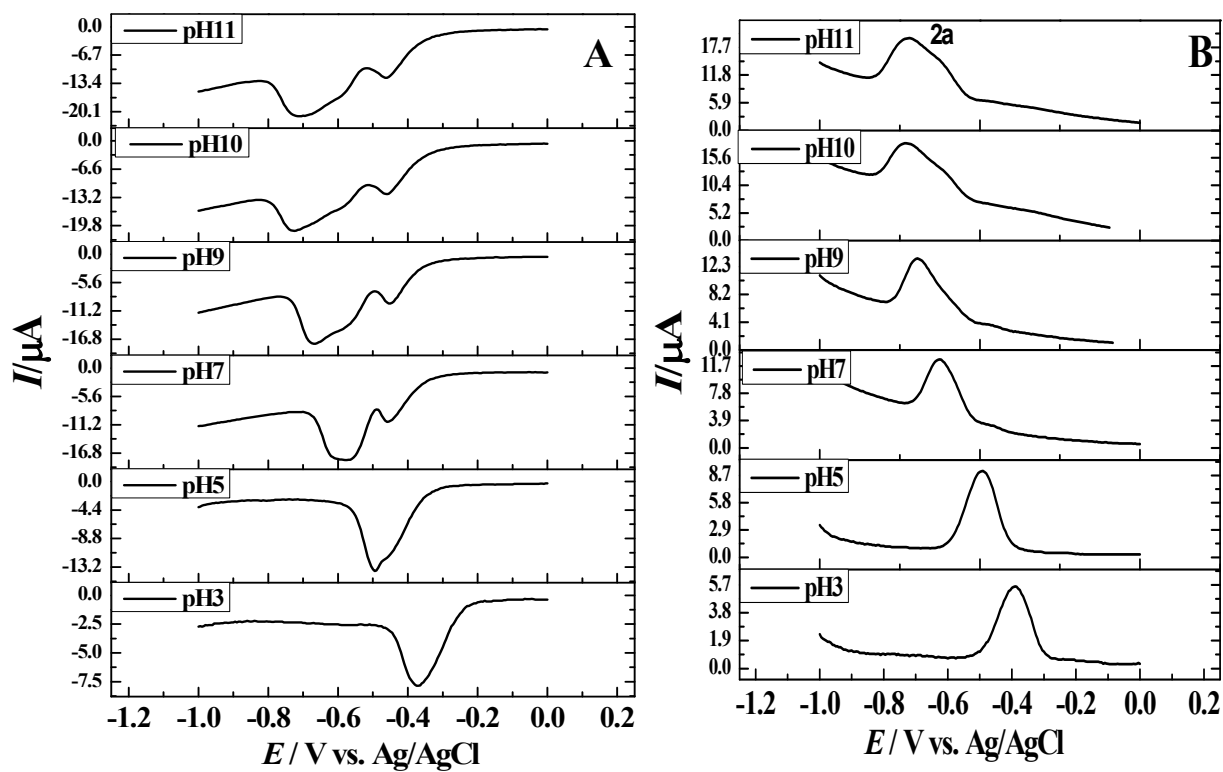

**Fig. S-2** (A) 1<sup>st</sup> and (B) 2<sup>nd</sup> scan DPVs showing reduction of 0.7 mM HCAQ and oxidation of the reduction product in 50% ethanol and 50% BR buffer of pH 3-11 at 5 mVs<sup>-1</sup>.

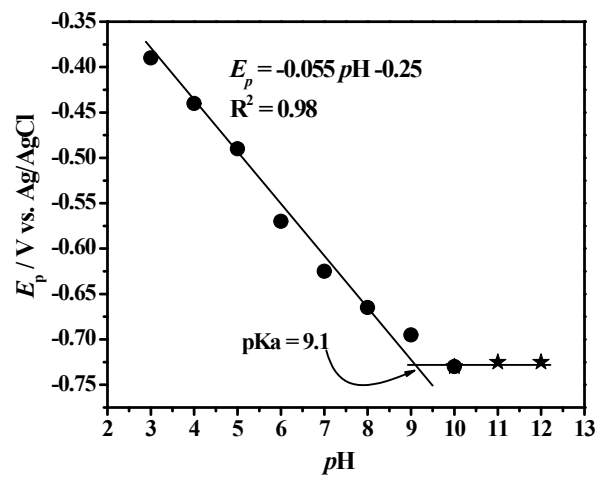

**Fig. S-3.**  $E_p$  as a function of pH using DPV data of peak 1c.

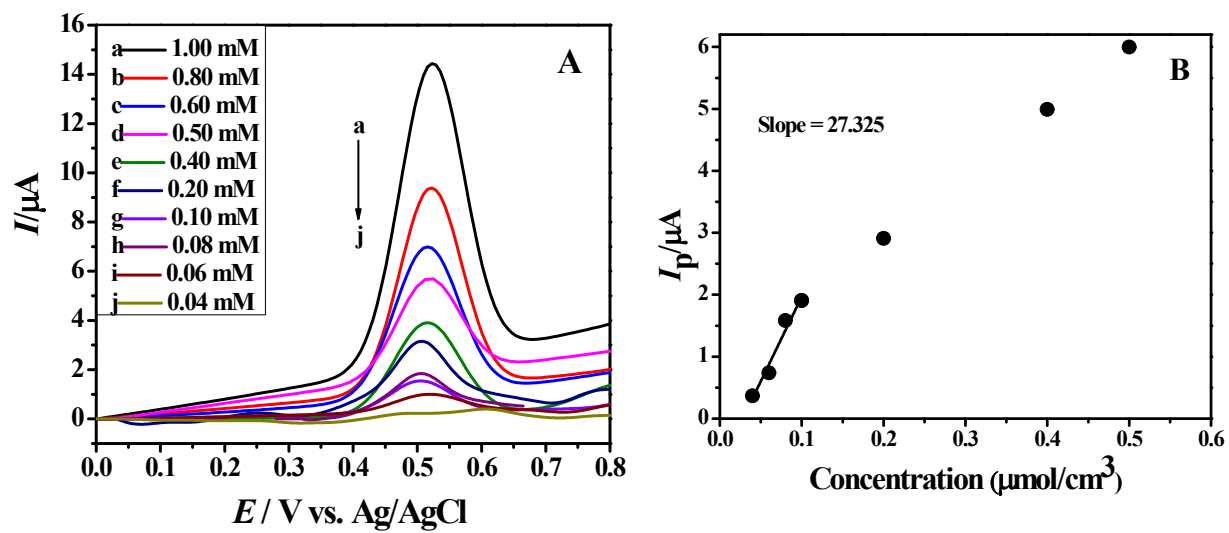

Fig. S-4. (A) SWV of different concentrations of HCAQ obtained at  $100 \text{ mVs}^{-1}$  in a medium of pH 10 (B) Plot of peak current *versus* concentration.
